# Supplementary material for: Regulating the cell shift of endothelial cell-like myofibroblasts in pulmonary fibrosis
Source: PubMed Central journal article supplement — Eur Respir J. 2023 Jun 8;61(6):2201799. doi: 10.1183/13993003.01799-2022 (PMC10249020; doi:10.1183/13993003.01799-2022), 2023-06-08

Supplemental Information

**Regulating the cell shift of endothelial cell-like myofibroblasts in pulmonary fibrosis**

Xiuju Wu, M.D., Ph.D.<sup>1\*</sup>, Daoqin Zhang, Ph.D.<sup>2\*</sup>, Xiaojing Qiao, Ph.D.<sup>1</sup>, Li Zhang, Ph.D.<sup>1</sup>, Xinjiang Cai, M.D., Ph.D.<sup>1</sup>, Jaden Ji, B.S.<sup>1</sup>, Jocelyn A. Ma, B.S.<sup>1</sup>, Yan Zhao, Ph.D.<sup>1</sup>, John A. Belperio, M.D.<sup>4</sup>, Kristina I. Boström, M.D., Ph.D.<sup>1,3,5</sup>, and Yucheng Yao, M.D., Ph.D.<sup>1,5</sup>

Correspondence: Yucheng Yao M.D. Ph.D. (Lead contact), or Kristina Bostrom, M.D., Ph.D.

This PDF file includes:

Supplemental Figures S1 and S2

Supplemental Figure Legends S2 and S2

Supplemental data 1 and description

Supplemental data 2 and description

Supplemental Figure S1 and Legend

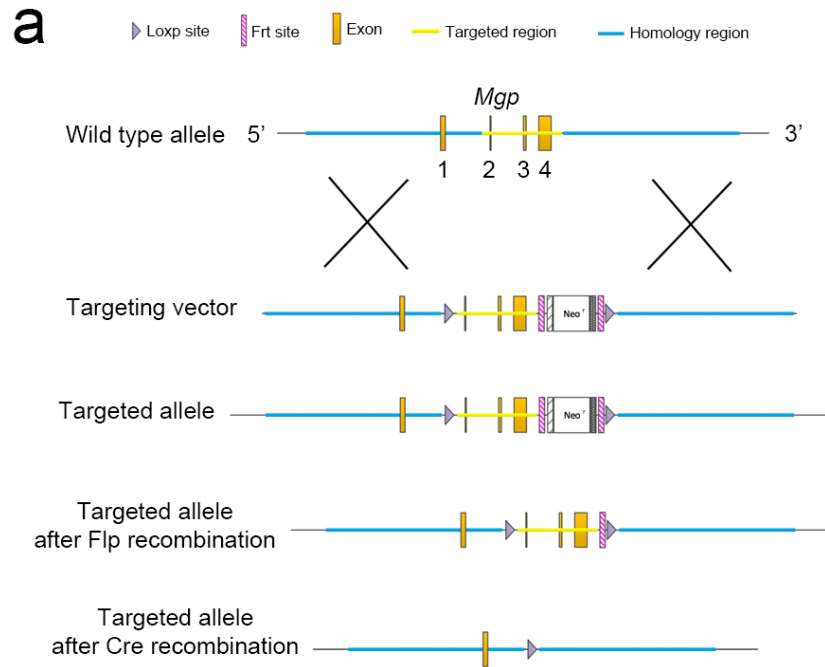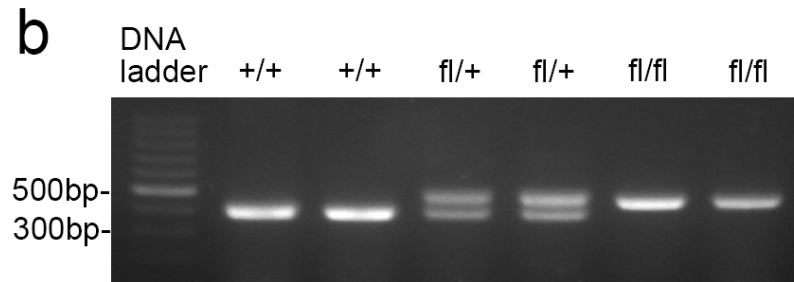

Supplemental data 1

*Generation of  $Mgp^{lox/lox}$  mice.*

a, Strategy of *Mgp* gene targeting.

b, Genotyping of  $Mgp^{lox/lox}$  ( $Mgp^{fl/fl}$ ) mice by PCR. +/+, wild type. fl/+, heterozygous. fl/fl, homozygous.

Supplemental Figure S2 and Legend

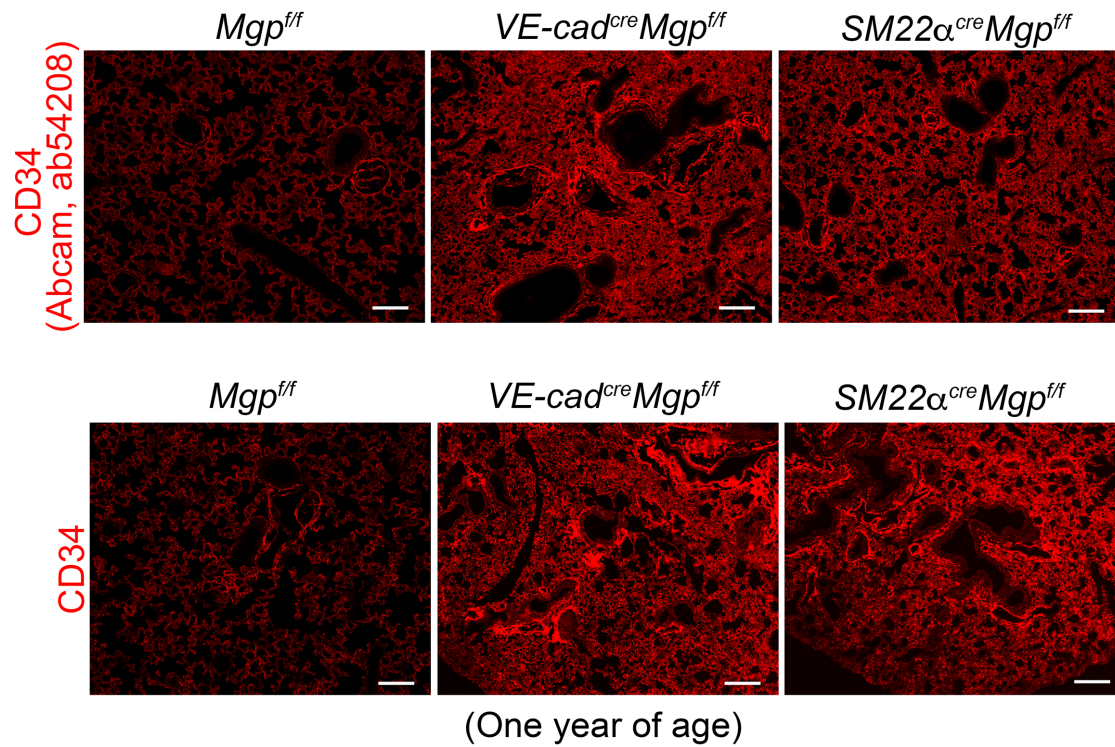

Supplemental Figure S2

*CD34 staining*

Top, Immunostaining using anti-CD34 antibodies (Abcam, ab54208).

Bottom, Immunostaining of lungs of mice at one-year old of age using anti-CD34 antibodies.

Scale, 100 μm.

## Supplemental data 1

The list of top 15 genes when ECs vs EC-like myofibroblasts & myofibroblasts and EC-like myofibroblasts & myofibroblasts vs ECs

### **Top 15 markers in ECs vs EC-like myofibroblasts & myofibroblasts**

Egfl7  
Cldn5  
Ramp2  
Ptprb  
Adgrf5  
Tspan7  
Cd93  
Clec14a  
Cdh5  
Calcr1  
Ehd4  
Cd36  
Epas1  
Pecam1  
Gpihbp1

### **Top 15 markers in EC-like myofibroblasts & myofibroblasts vs ECs**

Col3a1  
Cfh  
Plxdc2  
Serping1  
Sod3  
Pdgfra  
Col1a2  
Rarres2  
Mfap5  
Fxyd1  
Nupr1  
Col6a1  
Dpep1  
Loxl1  
Clec3b

Supplemental data 2

Gating strategies of FACS

Figure 2a

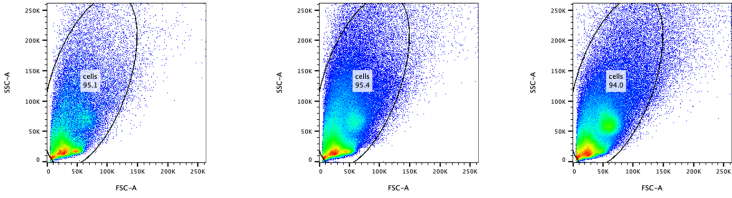

Figure 3d

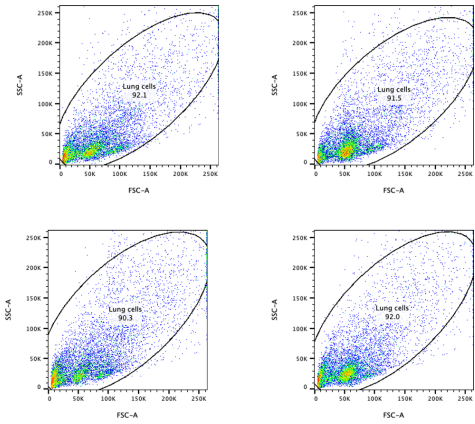

Figure 6a

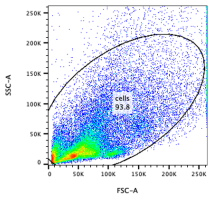

Supplement: ERJ-01799-2022.Supplement.pdf [file ERJ-01799-2022.Supplement.pdf]
